# Supplementary material for: Molecular sensing: modulating molecular conduction through intermolecular interactions
Source: Royal Society of Chemistry journal article supplement (doi:10.1039/c3cp43420f), 2013-01-01
Supplement: c3cp43420f.pdf [file c3cp43420f.pdf]

### Supplementary Information

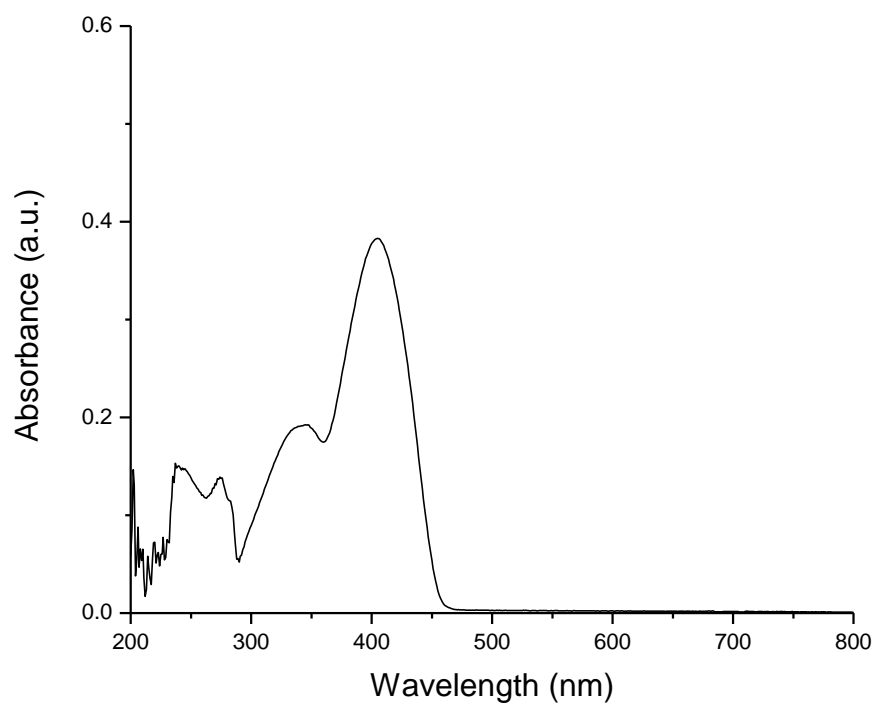

**Figure 1.** UV/VIS spectrum of OPV

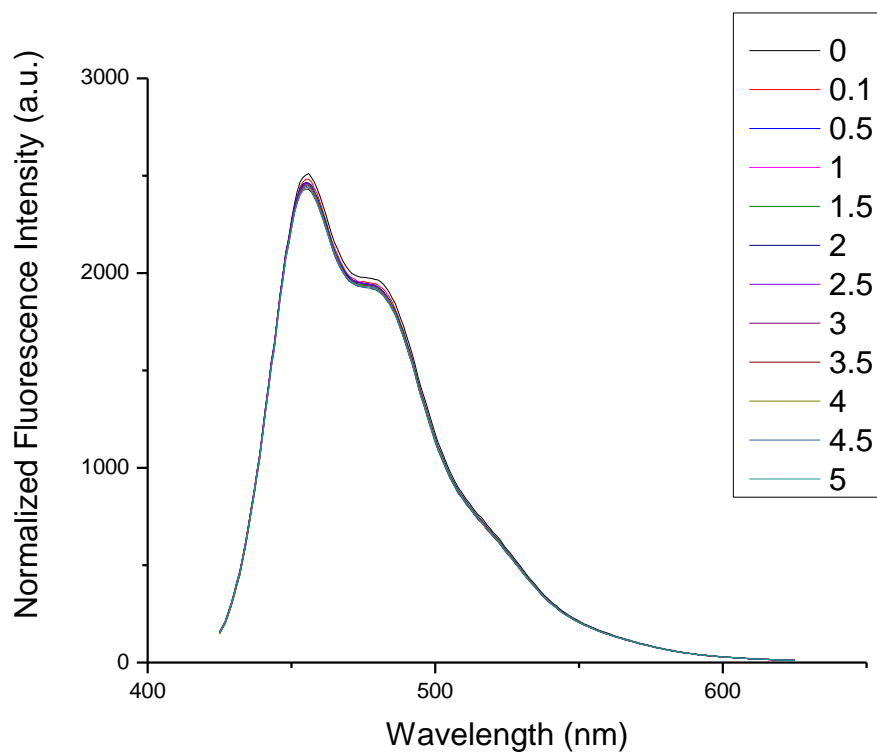

**Figure 2.** Sample fluorescence spectra for nitrobenzene experiment. The fluorescence intensity is normalized with the absorbance data.

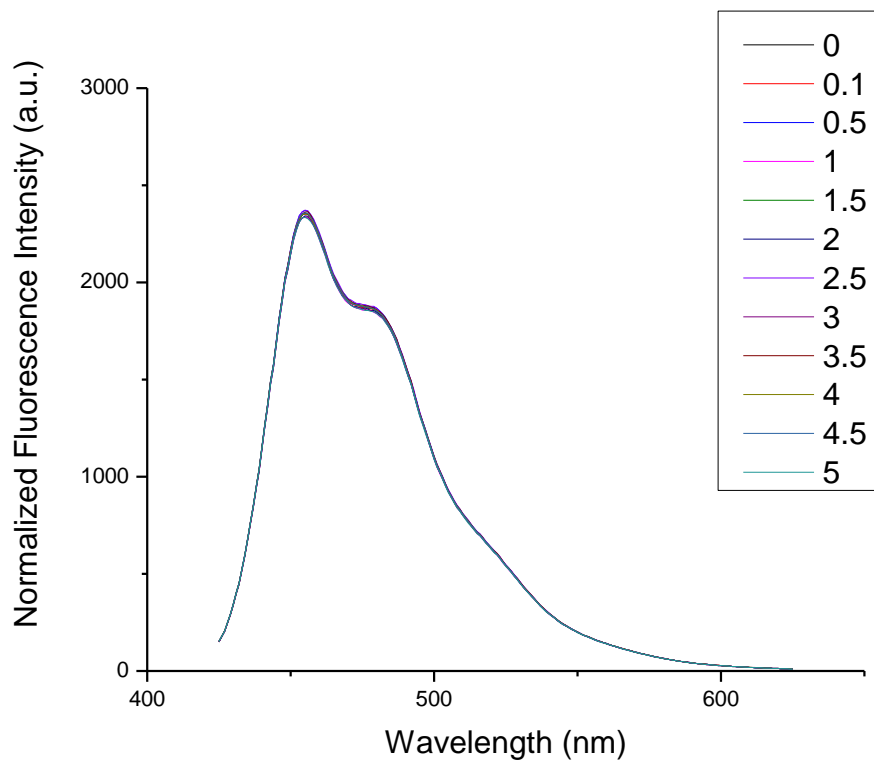

**Figure 3.** Normalized fluorescence intensity for toluene experiments.
